# Supplementary material
Source: MDPI journal article supplement (https://www.mdpi.com/1424-2818/14/7/549)
Supplement: s1 [file s1]

## **Supplementary information**

### **eDNA reveals the associated metazoan diversity of**

#### **Mediterranean seagrass sediments**

Marlene Wesselmann<sup>1</sup>, Nathan R. Gerald<sup>2</sup>, Núria Marbà<sup>1</sup>, Iris E. Hendriks<sup>1</sup>, Rubén Díaz-Rúa<sup>2</sup>, Carlos M. Duarte<sup>2</sup>

<sup>1</sup>Global Change Research Group, IMEDEA (CSIC-UIB), Institut Mediterrani d'Estudis Avançats, Miguel Marques 21, 07190, Esporles, Illes Balears, Spain

<sup>2</sup>Red Sea Research Centre (RSRC) and Computational Bioscience Research Center (CBRC), King Abdullah University of Science and Technology (KAUST), Thuwal, Saudi Arabia

\*Corresponding author: [m.wesselmann@imedea.uib-csic.es](mailto:m.wesselmann@imedea.uib-csic.es)

**Figure S1:** Nonmetric multidimensional scaling plot of temporal changes in metazoan communities within seagrass meadows (*H. stipulacea* in green; *C. nodosa* in orange; *P. oceanica* in blue). Ellipses show 95% standard error around the mean of the four time intervals and dark grey arrows indicate significant relationship ( $p < 0.05$ ) between the NMDS axes and different metazoan phyla. Greater length of arrows indicates greater  $r^2$  value and is relative to the importance of the explanatory variable in the ordination, and the arrow direction indicates positive or negative correlations. Kruskal stress = 0.16.

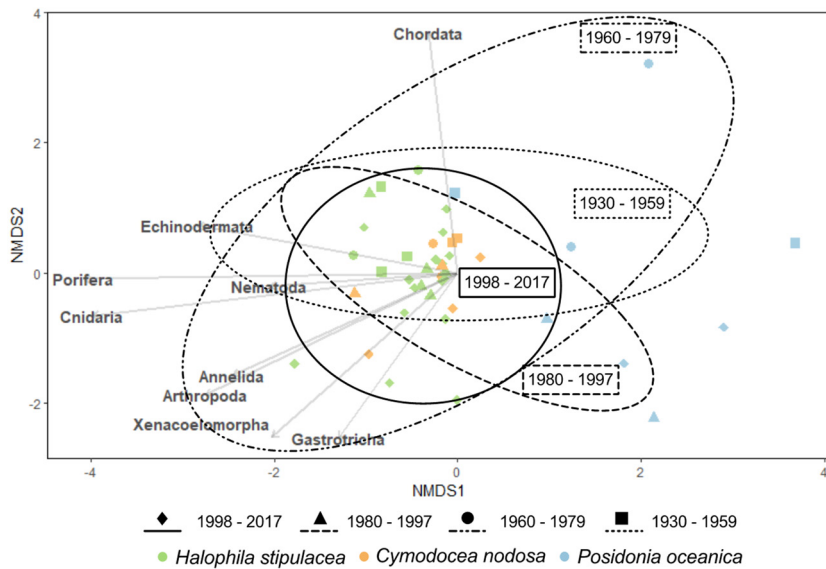

**Figure S2:** Number of metazoan orders in seagrass sediments identified for each time period (black dots). Columns indicate the number of orders either gained (blue) or lost (red) relative to the period before.

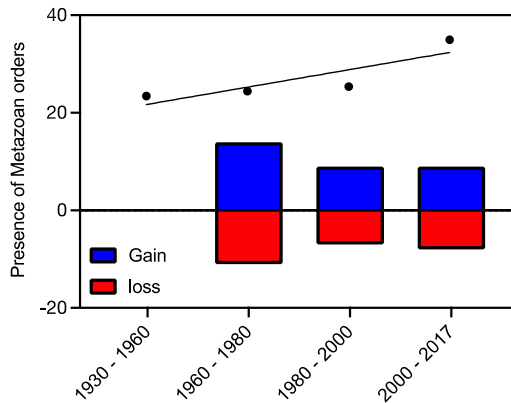

**Table S1:** Mock sample nucleic acid concentration (ng  $\mu\text{L}^{-1}$  per genus/ ng  $\mu\text{L}^{-1}$  of total sample x 100) and Sequence Variants reads (SV per genus/ SV reads of total sample x 100) after filtering and taxonomy assignment of several marine metazoans.

| Species name                     | Mock ID | Concentration ng $\mu\text{L}^{-1}$ | N° sequences |
|----------------------------------|---------|-------------------------------------|--------------|
| <i>Tursiops truncatus</i>        | Mock1   | 0.0024                              | 16103        |
| <i>Tridacna maxima</i>           | Mock1   | 0.000052                            | 2097         |
| <i>Chelonia mydas</i>            | Mock1   | 0.000216                            | 2446         |
| <i>Rhinoptera bonasus</i>        | Mock1   | 0.000208                            | 3231         |
| <i>Zebrasoma xanthurum</i>       | Mock1   | 0.0134                              | 0            |
| Holothuroidea                    | Mock1   | 0.0000086                           | 0            |
| <i>Sebastapistes cyanostigma</i> | Mock1   | 0.0000066                           | 0            |
| <i>Scylla serrata</i>            | Mock1   | 0.00000399                          | 0            |
| Ophiuroidea                      | Mock1   | 4.8E-08                             | 0            |
| <i>Lutjanus kasmira</i>          | Mock1   | 0.00000118                          | 0            |
| Tursiops                         | Mock1   | 0                                   | 871          |
| Actinopteri                      | Mock1   | 0                                   | 84288        |
| Chordata                         | Mock1   | 0                                   | 375          |
| Metazoa                          | Mock1   | 0                                   | 28           |
| <i>Homo sapiens</i>              | Mock1   | 0                                   | 169          |
| <i>Tursiops truncatus</i>        | Mock2   | 0.0000024                           | 0            |
| <i>Chelonia mydas</i>            | Mock2   | 0.00000216                          | 0            |
| <i>Zebrasoma xanthurum</i>       | Mock2   | 0.0134                              | 0            |
| <i>Rhinoptera bonasus</i>        | Mock2   | 0.00208                             | 14537        |

|                                  |       |            |       |
|----------------------------------|-------|------------|-------|
| <i>Lutjanus kasmira</i>          | Mock2 | 0.000118   | 0     |
| <i>Sebastapistes cyanostigma</i> | Mock2 | 0.0000066  | 0     |
| Ophiuroidea                      | Mock2 | 4.8E-08    | 0     |
| Holothuroidea                    | Mock2 | 0.000086   | 0     |
| <i>Scylla serrata</i>            | Mock2 | 0.000399   | 0     |
| <i>Tridacna maxima</i>           | Mock2 | 0.0000052  | 0     |
| <i>Sarpa salpa</i>               | Mock2 | 0.00000492 | 0     |
| <i>Siganus luridus</i>           | Mock2 | 0.0000186  | 798   |
| <i>Siganus rivulatus</i>         | Mock2 | 0.0026     | 17977 |
| Chondrichthyes                   | Mock2 | 0          | 175   |
| Actinopteri                      | Mock2 | 0          | 136   |
| Actinopteri                      | Mock2 | 0          | 43284 |

**Table S2:** Linear mixed effect model analysis of of Metazoan communities richness through time in seagrass meadows (*H.s.*: *H. stipulacea*, *C.n.*: *C.nodosa* and *P.o.*: *P. oceanica*) with Site as a random factor, Core nested in Site and Seagrass and Time as fixed factors.

| FIXED EFFECTS:          |          |      |         |       |         | RANDOM EFFECTS: |             |      |
|-------------------------|----------|------|---------|-------|---------|-----------------|-------------|------|
|                         | Estimate | SE   | T ratio | df    | p value | Group           | Parameter   | SD   |
| Richness                |          |      |         |       |         |                 |             |      |
| <i>P.o.</i>             | 19       | 3.45 | 5.51    | 35    | <0.001  | CORE:SITE       | (Intercept) | 0    |
| <i>C.n.</i>             | -7.67    | 4.45 | -1.72   | 35    | 0.09    | SITE            | (Intercept) | 0    |
| <i>H.s.</i>             | -9.13    | 3.66 | -2.49   | 35    | 0.02    | Residual        |             | 4.88 |
| 1980 - 1997             | 2.5      | 4.88 | 0.51    | 35    | 0.61    |                 |             |      |
| 1960 - 1979             | 6        | 4.88 | 1.23    | 35    | 0.23    |                 |             |      |
| 1930 - 1959             | 4        | 4.88 | 0.82    | 35    | 0.42    |                 |             |      |
| <i>C.n.</i> 1980 - 1997 | -5.5     | 6.3  | -0.87   | 35    | 0.39    |                 |             |      |
| <i>H.s.</i> 1980 - 1997 | -4.71    | 5.41 | -0.87   | 35    | 0.39    |                 |             |      |
| <i>C.n.</i> 1960 - 1979 | -10.33   | 6.6  | -1.56   | 35    | 0.13    |                 |             |      |
| <i>H.s.</i> 1960 - 1979 | -7.12    | 5.59 | -1.28   | 35    | 0.21    |                 |             |      |
| <i>C.n.</i> 1930 - 1959 | -9.67    | 6.3  | -1.54   | 35    | 0.13    |                 |             |      |
| <i>H.s.</i> 1930 - 1959 | -0.87    | 6.1  | -0.14   | 35    | 0.89    |                 |             |      |
| Shannon                 |          |      |         |       |         |                 |             |      |
| <i>P.o.</i>             | 2.91     | 0.41 | 7.08    | 35    | <0.001  | CORE:SITE       | (Intercept) | 0    |
| <i>C.n.</i>             | -0.49    | 0.53 | -0.92   | 35    | 0.36    | SITE            | (Intercept) | 0    |
| <i>H.s.</i>             | -0.72    | 0.44 | -1.64   | 35    | 0.11    | Residual        |             | 0.58 |
| 1980 - 1997             | 0.14     | 0.58 | 0.24    | 35    | 0.81    |                 |             |      |
| 1960 - 1979             | 0.29     | 0.58 | 0.5     | 35    | 0.62    |                 |             |      |
| 1930 - 1959             | 0.18     | 0.58 | 0.31    | 35    | 0.76    |                 |             |      |
| <i>C.n.</i> 1980 - 1997 | -0.46    | 0.75 | -0.62   | 35    | 0.54    |                 |             |      |
| <i>H.s.</i> 1980 - 1997 | -0.41    | 0.64 | -0.64   | 35    | 0.53    |                 |             |      |
| <i>C.n.</i> 1960 - 1979 | -0.81    | 0.79 | -1.03   | 35    | 0.31    |                 |             |      |
| <i>H.s.</i> 1960 - 1979 | -0.7     | 0.67 | -1.06   | 35    | 0.3     |                 |             |      |
| <i>C.n.</i> 1930 - 1959 | -1.17    | 0.75 | -1.57   | 35    | 0.13    |                 |             |      |
| <i>H.s.</i> 1930 - 1959 | 0.18     | 0.73 | 0.25    | 35    | 0.8     |                 |             |      |
| Chordata                |          |      |         |       |         |                 |             |      |
| <i>P.o.</i>             | 1.32     | 2.12 | 0.62    | 27.26 | 0.54    | CORE:SITE       | (Intercept) | 0    |
| <i>C.n.</i>             | 0.74     | 2.71 | 0.27    | 32.39 | 0.79    | SITE            | (Intercept) | 0.58 |
| <i>H.s.</i>             | 1.55     | 2.2  | 0.71    | 34.99 | 0.48    | Residual        |             | 2.9  |
| 1980 - 1997             | 2        | 2.9  | 0.69    | 32.27 | 0.49    |                 |             |      |
| 1960 - 1979             | 8        | 2.9  | 2.76    | 32.27 | 0.01    |                 |             |      |
| 1930 - 1959             | 7        | 2.9  | 2.42    | 32.27 | 0.02    |                 |             |      |
| <i>C.n.</i> 1980 - 1997 | -0.24    | 3.75 | -0.06   | 33.17 | 0.95    |                 |             |      |
| <i>H.s.</i> 1980 - 1997 | -1.98    | 3.21 | -0.62   | 32.44 | 0.54    |                 |             |      |
| <i>C.n.</i> 1960 - 1979 | -5.85    | 3.93 | -1.49   | 32.85 | 0.15    |                 |             |      |
| <i>H.s.</i> 1960 - 1979 | -7.56    | 3.33 | -2.27   | 33.77 | 0.03    |                 |             |      |
| <i>C.n.</i> 1930 - 1959 | -6.03    | 3.76 | -1.6    | 34.22 | 0.12    |                 |             |      |
| <i>H.s.</i> 1930 - 1959 | -4.11    | 3.65 | -1.13   | 34.55 | 0.27    |                 |             |      |
| Mollusca                |          |      |         |       |         |                 |             |      |

|                         |       |      |       |       |        |                       |      |
|-------------------------|-------|------|-------|-------|--------|-----------------------|------|
| <i>P.o.</i>             | 0.65  | 0.64 | 1.01  | 28.27 | 0.32   | CORE:SITE (Intercept) | 0    |
| <i>C.n.</i>             | 0.3   | 0.8  | 0.38  | 34.99 | 0.71   | SITE (Intercept)      | 0.36 |
| <i>H.s.</i>             | 0.05  | 0.64 | 0.07  | 34.11 | 0.94   | Residual              | 0.82 |
| 1980 - 1997             | 0     | 0.82 | 0     | 31.78 | 1      |                       |      |
| 1960 - 1979             | 0.5   | 0.82 | 0.61  | 31.78 | 0.55   |                       |      |
| 1930 - 1959             | 0.5   | 0.82 | 0.61  | 31.78 | 0.55   |                       |      |
| <i>C.n.</i> 1980 - 1997 | -0.16 | 1.07 | -0.15 | 32.51 | 0.88   |                       |      |
| <i>H.s.</i> 1980 - 1997 | 0.44  | 0.91 | 0.48  | 31.92 | 0.64   |                       |      |
| <i>C.n.</i> 1960 - 1979 | -0.92 | 1.12 | -0.82 | 32.18 | 0.42   |                       |      |
| <i>H.s.</i> 1960 - 1979 | -0.67 | 0.95 | -0.7  | 32.73 | 0.49   |                       |      |
| <i>C.n.</i> 1930 - 1959 | -1.36 | 1.08 | -1.26 | 33.05 | 0.22   |                       |      |
| <i>H.s.</i> 1930 - 1959 | 1.1   | 1.05 | 1.05  | 33.31 | 0.3    |                       |      |
| <b>Cnidaria</b>         |       |      |       |       |        |                       |      |
| <i>P.o.</i>             | 2.5   | 0.56 | 4.49  | 35    | <0.001 | CORE:SITE (Intercept) | 0    |
| <i>C.n.</i>             | -2.17 | 0.72 | -3.02 | 35    | <0.001 | SITE (Intercept)      | 0    |
| <i>H.s.</i>             | -2.13 | 0.59 | -3.6  | 35    | <0.001 | Residual              | 0.79 |
| 1980 - 1997             | 1     | 0.79 | 1.27  | 35    | 0.21   |                       |      |
| 1960 - 1979             | -1    | 0.79 | -1.27 | 35    | 0.21   |                       |      |
| 1930 - 1959             | 1     | 0.79 | 1.27  | 35    | 0.21   |                       |      |
| <i>C.n.</i> 1980 - 1997 | -1.33 | 1.02 | -1.31 | 35    | 0.2    |                       |      |
| <i>H.s.</i> 1980 - 1997 | -1.37 | 0.87 | -1.58 | 35    | 0.12   |                       |      |
| <i>C.n.</i> 1960 - 1979 | 0.67  | 1.07 | 0.63  | 35    | 0.54   |                       |      |
| <i>H.s.</i> 1960 - 1979 | 0.88  | 0.9  | 0.97  | 35    | 0.34   |                       |      |
| <i>C.n.</i> 1930 - 1959 | -1.33 | 1.02 | -1.31 | 35    | 0.2    |                       |      |
| <i>H.s.</i> 1930 - 1959 | -0.87 | 0.98 | -0.89 | 35    | 0.38   |                       |      |
| <b>Porifera</b>         |       |      |       |       |        |                       |      |
| <i>P.o.</i>             | 2.5   | 0.23 | 10.8  | 35    | <0.001 | CORE:SITE (Intercept) | 0    |
| <i>C.n.</i>             | -2.5  | 0.3  | -8.37 | 35    | <0.001 | SITE (Intercept)      | 0    |
| <i>H.s.</i>             | -2.5  | 0.25 | -     | 35    | <0.001 | Residual              | 0.33 |
|                         |       |      | 10.18 |       |        |                       |      |
| 1980 - 1997             | -1    | 0.33 | -3.06 | 35    | <0.001 |                       |      |
| 1960 - 1979             | -1.5  | 0.33 | -4.58 | 35    | <0.001 |                       |      |
| 1930 - 1959             | -1.5  | 0.33 | -4.58 | 35    | <0.001 |                       |      |
| <i>C.n.</i> 1980 - 1997 | 1     | 0.42 | 2.37  | 35    | 0.02   |                       |      |
| <i>H.s.</i> 1980 - 1997 | 1     | 0.36 | 2.76  | 35    | 0.01   |                       |      |
| <i>C.n.</i> 1960 - 1979 | 1.5   | 0.44 | 3.38  | 35    | <0.001 |                       |      |
| <i>H.s.</i> 1960 - 1979 | 1.75  | 0.38 | 4.67  | 35    | <0.001 |                       |      |
| <i>C.n.</i> 1930 - 1959 | 1.5   | 0.42 | 3.55  | 35    | <0.001 |                       |      |
| <i>H.s.</i> 1930 - 1959 | 1.5   | 0.41 | 3.67  | 35    | <0.001 |                       |      |
| <b>Echinodermata</b>    |       |      |       |       |        |                       |      |
| <i>P.o.</i>             | 1.5   | 0.39 | 3.86  | 35    | <0.001 | CORE:SITE (Intercept) | 0    |
| <i>C.n.</i>             | -1.5  | 0.5  | -2.99 | 35    | 0.01   | SITE (Intercept)      | 0    |
| <i>H.s.</i>             | -1.38 | 0.41 | -3.33 | 35    | <0.001 | Residual              | 0.55 |
| 1980 - 1997             | -0.5  | 0.55 | -0.91 | 35    | 0.37   |                       |      |
| 1960 - 1979             | 0     | 0.55 | 0     | 35    | 1      |                       |      |
| 1930 - 1959             | -1    | 0.55 | -1.82 | 35    | 0.08   |                       |      |

|                         |       |      |       |       |        |                            |
|-------------------------|-------|------|-------|-------|--------|----------------------------|
| <i>C.n.</i> 1980 - 1997 | 0.5   | 0.71 | 0.7   | 35    | 0.49   |                            |
| <i>H.s.</i> 1980 - 1997 | 0.71  | 0.61 | 1.16  | 35    | 0.25   |                            |
| <i>C.n.</i> 1960 - 1979 | 0.5   | 0.74 | 0.67  | 35    | 0.51   |                            |
| <i>H.s.</i> 1960 - 1979 | 0.38  | 0.63 | 0.6   | 35    | 0.56   |                            |
| <i>C.n.</i> 1930 - 1959 | 1     | 0.71 | 1.41  | 35    | 0.17   |                            |
| <i>H.s.</i> 1930 - 1959 | 1.38  | 0.69 | 2     | 35    | 0.05   |                            |
| <b>Arthropoda</b>       |       |      |       |       |        |                            |
| <i>P.o.</i>             | 3.03  | 0.92 | 3.3   | 29.12 | <0.001 | CORE:SITE (Intercept) 0    |
| <i>C.n.</i>             | -0.87 | 1.15 | -0.76 | 34.96 | 0.45   | SITE (Intercept) 0.49      |
| <i>H.s.</i>             | -1.96 | 0.91 | -2.15 | 34.34 | 0.04   | Residual 1.19              |
| 1980 - 1997             | 1     | 1.19 | 0.84  | 32.19 | 0.41   |                            |
| 1960 - 1979             | -1    | 1.19 | -0.84 | 32.19 | 0.41   |                            |
| 1930 - 1959             | -0.5  | 1.19 | -0.42 | 32.19 | 0.68   |                            |
| <i>C.n.</i> 1980 - 1997 | -3.3  | 1.54 | -2.14 | 32.86 | 0.04   |                            |
| <i>H.s.</i> 1980 - 1997 | -1.07 | 1.32 | -0.81 | 32.32 | 0.42   |                            |
| <i>C.n.</i> 1960 - 1979 | -0.8  | 1.61 | -0.5  | 32.57 | 0.62   |                            |
| <i>H.s.</i> 1960 - 1979 | 0.49  | 1.37 | 0.36  | 33.09 | 0.72   |                            |
| <i>C.n.</i> 1930 - 1959 | -1.48 | 1.55 | -0.95 | 33.39 | 0.35   |                            |
| <i>H.s.</i> 1930 - 1959 | 0.7   | 1.51 | 0.47  | 33.63 | 0.64   |                            |
| <b>Annelida</b>         |       |      |       |       |        |                            |
| <i>P.o.</i>             | 1.5   | 0.78 | 1.93  | 14.11 | 0.07   | CORE:SITE (Intercept) 0.29 |
| <i>C.n.</i>             | -0.17 | 0.99 | -0.17 | 20.14 | 0.86   | SITE (Intercept) 0         |
| <i>H.s.</i>             | -0.65 | 0.82 | -0.78 | 14.14 | 0.45   | Residual 1.02              |
| 1980 - 1997             | 1.5   | 1.02 | 1.47  | 24.94 | 0.15   |                            |
| 1960 - 1979             | 1.5   | 1.02 | 1.47  | 24.94 | 0.15   |                            |
| 1930 - 1959             | 1.5   | 1.02 | 1.47  | 24.94 | 0.15   |                            |
| <i>C.n.</i> 1980 - 1997 | 0.5   | 1.02 | 0.49  | 24.94 | 0.63   |                            |
| <i>H.s.</i> 1980 - 1997 | -2.13 | 1.13 | -1.88 | 25.68 | 0.07   |                            |
| <i>C.n.</i> 1960 - 1979 | -2.81 | 1.39 | -2.03 | 26.63 | 0.05   |                            |
| <i>H.s.</i> 1960 - 1979 | -2.05 | 1.18 | -1.74 | 29.61 | 0.09   |                            |
| <i>C.n.</i> 1930 - 1959 | -1.52 | 1.33 | -1.14 | 30.61 | 0.26   |                            |
| <i>H.s.</i> 1930 - 1959 | -1.27 | 1.29 | -0.99 | 29.27 | 0.33   |                            |
| <b>Nematoda</b>         |       |      |       |       |        |                            |
| <i>P.o.</i>             | 0.5   | 0.12 | 4.18  | 35    | <0.001 | CORE:SITE (Intercept) 0    |
| <i>C.n.</i>             | -0.5  | 0.15 | -3.24 | 35    | <0.001 | SITE (Intercept) 0         |
| <i>H.s.</i>             | -0.5  | 0.13 | -3.94 | 35    | <0.001 | Residual 0.17              |
| 1980 - 1997             | -0.5  | 0.17 | -2.96 | 35    | 0.01   |                            |
| 1960 - 1979             | 0     | 0.17 | 0     | 35    | 1      |                            |
| 1930 - 1959             | -0.5  | 0.17 | -2.96 | 35    | 0.01   |                            |
| <i>C.n.</i> 1980 - 1997 | 0.5   | 0.22 | 2.29  | 35    | 0.03   |                            |
| <i>H.s.</i> 1980 - 1997 | 0.5   | 0.19 | 2.67  | 35    | 0.01   |                            |
| <i>C.n.</i> 1960 - 1979 | 0     | 0.23 | 0     | 35    | 1      |                            |
| <i>H.s.</i> 1960 - 1979 | 0     | 0.19 | 0     | 35    | 1      |                            |
| <i>C.n.</i> 1930 - 1959 | 0.5   | 0.22 | 2.29  | 35    | 0.03   |                            |
| <i>H.s.</i> 1930 - 1959 | 0.5   | 0.21 | 2.37  | 35    | 0.02   |                            |
| <b>Actinopteri</b>      |       |      |       |       |        |                            |

|                         |       |      |       |       |        |                       |      |
|-------------------------|-------|------|-------|-------|--------|-----------------------|------|
| <i>P.o.</i>             | 0.89  | 1.52 | 0.59  | 28.18 | 0.56   | CORE:SITE (Intercept) | 0    |
| <i>C.n.</i>             | 0.98  | 1.88 | 0.52  | 35    | 0.61   | SITE (Intercept)      | 0.88 |
| <i>H.s.</i>             | 0.83  | 1.5  | 0.56  | 34.02 | 0.58   | Residual              | 1.94 |
| 1980 - 1997             | 1.5   | 1.94 | 0.77  | 31.78 | 0.44   |                       |      |
| 1960 - 1979             | 6     | 1.94 | 3.1   | 31.78 | <0.001 |                       |      |
| 1930 - 1959             | 4.5   | 1.94 | 2.32  | 31.78 | 0.03   |                       |      |
| <i>C.n.</i> 1980 - 1997 | -0.85 | 2.52 | -0.34 | 32.48 | 0.74   |                       |      |
| <i>H.s.</i> 1980 - 1997 | -0.92 | 2.15 | -0.43 | 31.92 | 0.67   |                       |      |
| <i>C.n.</i> 1960 - 1979 | -4.8  | 2.63 | -1.82 | 32.17 | 0.08   |                       |      |
| <i>H.s.</i> 1960 - 1979 | -5.63 | 2.24 | -2.51 | 32.69 | 0.02   |                       |      |
| <i>C.n.</i> 1930 - 1959 | -3.63 | 2.54 | -1.43 | 32.99 | 0.16   |                       |      |
| <i>H.s.</i> 1930 - 1959 | -3.26 | 2.47 | -1.32 | 33.23 | 0.2    |                       |      |
| <b>Bivalvia</b>         |       |      |       |       |        |                       |      |
| <i>P.o.</i>             | 0.57  | 0.6  | 0.95  | 27.46 | 0.35   | CORE:SITE (Intercept) | 0    |
| <i>C.n.</i>             | 0.08  | 0.75 | 0.1   | 34.64 | 0.92   | SITE (Intercept)      | 0.28 |
| <i>H.s.</i>             | 0.05  | 0.6  | 0.08  | 34.4  | 0.93   | Residual              | 0.78 |
| 1980 - 1997             | 0     | 0.78 | 0     | 31.34 | 1      |                       |      |
| 1960 - 1979             | 0     | 0.78 | 0     | 31.34 | 1      |                       |      |
| 1930 - 1959             | 0.5   | 0.78 | 0.64  | 31.34 | 0.53   |                       |      |
| <i>C.n.</i> 1980 - 1997 | -0.2  | 1.02 | -0.2  | 32.28 | 0.85   |                       |      |
| <i>H.s.</i> 1980 - 1997 | 0.34  | 0.87 | 0.39  | 31.52 | 0.7    |                       |      |
| <i>C.n.</i> 1960 - 1979 | -0.1  | 1.06 | -0.09 | 31.88 | 0.93   |                       |      |
| <i>H.s.</i> 1960 - 1979 | -0.02 | 0.91 | -0.02 | 32.68 | 0.98   |                       |      |
| <i>C.n.</i> 1930 - 1959 | -0.95 | 1.02 | -0.93 | 33.11 | 0.36   |                       |      |
| <i>H.s.</i> 1930 - 1959 | 1.22  | 0.99 | 1.22  | 33.47 | 0.23   |                       |      |
| <b>Anthozoa</b>         |       |      |       |       |        |                       |      |
| <i>P.o.</i>             | 0     | 0.22 | 0     | 35    | 1      | CORE:SITE (Intercept) | 0    |
| <i>C.n.</i>             | 0     | 0.28 | 0     | 35    | 1      | SITE (Intercept)      | 0    |
| <i>H.s.</i>             | 0     | 0.23 | 0     | 35    | 1      | Residual              | 0.3  |
| 1980 - 1997             | 0     | 0.3  | 0     | 35    | 1      |                       |      |
| 1960 - 1979             | 0     | 0.3  | 0     | 35    | 1      |                       |      |
| 1930 - 1959             | 1     | 0.3  | 3.28  | 35    | <0.001 |                       |      |
| <i>C.n.</i> 1980 - 1997 | 0     | 0.39 | 0     | 35    | 1      |                       |      |
| <i>H.s.</i> 1980 - 1997 | 0     | 0.34 | 0     | 35    | 1      |                       |      |
| <i>C.n.</i> 1960 - 1979 | 0     | 0.41 | 0     | 35    | 1      |                       |      |
| <i>H.s.</i> 1960 - 1979 | 0.25  | 0.35 | 0.72  | 35    | 0.48   |                       |      |
| <i>C.n.</i> 1930 - 1959 | -1    | 0.39 | -2.54 | 35    | 0.02   |                       |      |
| <i>H.s.</i> 1930 - 1959 | -0.5  | 0.38 | -1.31 | 35    | 0.2    |                       |      |
| <b>Staurozoa</b>        |       |      |       |       |        |                       |      |
| <i>P.o.</i>             | 0     | 0.08 | 0     | 35    | 1      | CORE:SITE (Intercept) | 0    |
| <i>C.n.</i>             | 0     | 0.11 | 0     | 35    | 1      | SITE (Intercept)      | 0    |
| <i>H.s.</i>             | 0     | 0.09 | 0     | 35    | 1      | Residual              | 0.12 |
| 1980 - 1997             | 1     | 0.12 | 8.37  | 35    | <0.001 |                       |      |
| 1960 - 1979             | 0     | 0.12 | 0     | 35    | 1      |                       |      |
| 1930 - 1959             | 0.5   | 0.12 | 4.18  | 35    | <0.001 |                       |      |
| <i>C.n.</i> 1980 - 1997 | -1    | 0.15 | -6.48 | 35    | <0.001 |                       |      |



|                         |       |      |       |       |        |                       |      |
|-------------------------|-------|------|-------|-------|--------|-----------------------|------|
| <i>H.s.</i> 1980 - 1997 | -1    | 0.13 | -7.55 | 35    | <0.001 |                       |      |
| <i>C.n.</i> 1960 - 1979 | 0     | 0.16 | 0     | 35    | 1      |                       |      |
| <i>H.s.</i> 1960 - 1979 | 0     | 0.14 | 0     | 35    | 1      |                       |      |
| <i>C.n.</i> 1930 - 1959 | -0.5  | 0.15 | -3.24 | 35    | <0.001 |                       |      |
| <i>H.s.</i> 1930 - 1959 | -0.5  | 0.15 | -3.35 | 35    | <0.001 |                       |      |
| <b>Hydrozoa</b>         |       |      |       |       |        |                       |      |
| <i>P.o.</i>             | 1.5   | 0.24 | 6.32  | 35    | <0.001 | CORE:SITE (Intercept) | 0    |
| <i>C.n.</i>             | -1.5  | 0.31 | -4.9  | 35    | <0.001 | SITE (Intercept)      | 0    |
| <i>H.s.</i>             | -1.5  | 0.34 | -4.47 | 35    | <0.001 | Residual              | 0.34 |
| 1980 - 1997             | -0.5  | 0.34 | -1.49 | 35    | 0.14   |                       |      |
| 1960 - 1979             | 1     | 0.34 | 2.98  | 35    | 0.01   |                       |      |
| 1930 - 1959             | 0     | 0.34 | 0     | 35    | 1      |                       |      |
| <i>C.n.</i> 1980 - 1997 | 0.5   | 0.45 | 1.1   | 35    | 0.28   |                       |      |
| <i>H.s.</i> 1980 - 1997 | 0.5   | 0.44 | 1.13  | 35    | 0.27   |                       |      |
| <i>C.n.</i> 1960 - 1979 | -1    | 0.43 | -2.31 | 35    | 0.03   |                       |      |
| <i>H.s.</i> 1960 - 1979 | -1    | 0.43 | -2.31 | 35    | 0.03   |                       |      |
| <i>C.n.</i> 1930 - 1959 | 0     | 0.43 | 0     | 35    | 1      |                       |      |
| <i>H.s.</i> 1930 - 1959 | 0.19  | 0.42 | 0.45  | 35    | 0.66   |                       |      |
| <b>Hexanauplia</b>      |       |      |       |       |        |                       |      |
| <i>P.o.</i>             | 2.24  | 0.67 | 3.37  | 18.49 | <0.001 | CORE:SITE (Intercept) | 0.08 |
| <i>C.n.</i>             | -0.99 | 0.84 | -1.17 | 24.07 | 0.25   | SITE (Intercept)      | 0.26 |
| <i>H.s.</i>             | -1.68 | 0.68 | -2.47 | 14.38 | 0.03   | Residual              | 0.88 |
| 1980 - 1997             | -0.5  | 0.88 | -0.57 | 27.84 | 0.57   |                       |      |
| 1960 - 1979             | -1.5  | 0.88 | -1.7  | 27.84 | 0.1    |                       |      |
| 1930 - 1959             | -0.5  | 0.88 | -0.57 | 27.84 | 0.57   |                       |      |
| <i>C.n.</i> 1980 - 1997 | -0.84 | 1.14 | -0.74 | 29.65 | 0.47   |                       |      |
| <i>H.s.</i> 1980 - 1997 | 0.35  | 0.98 | 0.36  | 28.44 | 0.72   |                       |      |
| <i>C.n.</i> 1960 - 1979 | 0.66  | 1.2  | 0.55  | 29.13 | 0.59   |                       |      |
| <i>H.s.</i> 1960 - 1979 | 1.6   | 1.02 | 1.57  | 31.11 | 0.13   |                       |      |
| <i>C.n.</i> 1930 - 1959 | -0.85 | 1.15 | -0.74 | 32    | 0.46   |                       |      |
| <i>H.s.</i> 1930 - 1959 | 0.86  | 1.12 | 0.77  | 30.51 | 0.45   |                       |      |
| <b>Polychaeta</b>       |       |      |       |       |        |                       |      |
| <i>P.o.</i>             | 1.5   | 0.55 | 2.74  | 35    | 0.01   | CORE:SITE (Intercept) | 0    |
| <i>C.n.</i>             | -0.5  | 0.71 | -0.71 | 35    | 0.48   | SITE (Intercept)      | 0    |
| <i>H.s.</i>             | -0.94 | 0.58 | -1.61 | 35    | 0.12   | Residual              | 0.77 |
| 1980 - 1997             | 1     | 0.77 | 1.29  | 35    | 0.21   |                       |      |
| 1960 - 1979             | 1     | 0.77 | 1.29  | 35    | 0.21   |                       |      |
| 1930 - 1959             | 0.5   | 0.77 | 0.65  | 35    | 0.52   |                       |      |
| <i>C.n.</i> 1980 - 1997 | -2    | 1    | -2    | 35    | 0.05   |                       |      |
| <i>H.s.</i> 1980 - 1997 | -1.4  | 0.86 | -1.62 | 35    | 0.11   |                       |      |
| <i>C.n.</i> 1960 - 1979 | -2    | 1.05 | -1.91 | 35    | 0.06   |                       |      |
| <i>H.s.</i> 1960 - 1979 | -1.31 | 0.89 | -1.48 | 35    | 0.15   |                       |      |
| <i>C.n.</i> 1930 - 1959 | -1.5  | 1    | -1.5  | 35    | 0.14   |                       |      |
| <i>H.s.</i> 1930 - 1959 | -1.06 | 0.97 | -1.1  | 35    | 0.28   |                       |      |
| <b>Demospongiae</b>     |       |      |       |       |        |                       |      |
| <i>P.o.</i>             | 2     | 0.27 | 7.3   | 35    | <0.001 | CORE:SITE (Intercept) | 0    |

|                         |       |      |       |    |        |           |             |      |
|-------------------------|-------|------|-------|----|--------|-----------|-------------|------|
| <i>C.n.</i>             | -2    | 0.35 | -5.66 | 35 | <0.001 | SITE      | (Intercept) | 0    |
| <i>H.s.</i>             | -2    | 0.29 | -6.89 | 35 | <0.001 | Residual  |             | 0.39 |
| 1980 - 1997             | -0.5  | 0.39 | -1.29 | 35 | 0.21   |           |             |      |
| 1960 - 1979             | -1    | 0.39 | -2.58 | 35 | 0.01   |           |             |      |
| 1930 - 1959             | -1    | 0.39 | -2.58 | 35 | 0.01   |           |             |      |
| <i>C.n.</i> 1980 - 1997 | 0.5   | 0.5  | 1     | 35 | 0.32   |           |             |      |
| <i>H.s.</i> 1980 - 1997 | 0.5   | 0.43 | 1.16  | 35 | 0.25   |           |             |      |
| <i>C.n.</i> 1960 - 1979 | 1     | 0.52 | 1.91  | 35 | 0.06   |           |             |      |
| <i>H.s.</i> 1960 - 1979 | 1.25  | 0.44 | 2.82  | 35 | 0.01   |           |             |      |
| <i>C.n.</i> 1930 - 1959 | 1     | 0.5  | 2     | 35 | 0.05   |           |             |      |
| <i>H.s.</i> 1930 - 1959 | 1     | 0.48 | 2.07  | 35 | 0.05   |           |             |      |
| <b>Ophiuroidea</b>      |       |      |       |    |        |           |             |      |
| <i>P.o.</i>             | 1     | 0.22 | 4.64  | 35 | <0.001 | CORE:SITE | (Intercept) | 0    |
| <i>C.n.</i>             | -1    | 0.28 | -3.59 | 35 | <0.001 | SITE      | (Intercept) | 0    |
| <i>H.s.</i>             | -1    | 0.23 | -4.38 | 35 | <0.001 | Residual  |             | 0.3  |
| 1980 - 1997             | 0     | 0.3  | 0     | 35 | 1      |           |             |      |
| 1960 - 1979             | 0     | 0.3  | 0     | 35 | 1      |           |             |      |
| 1930 - 1959             | -0.5  | 0.3  | -1.64 | 35 | 0.11   |           |             |      |
| <i>C.n.</i> 1980 - 1997 | 0     | 0.39 | 0     | 35 | 1      |           |             |      |
| <i>H.s.</i> 1980 - 1997 | 0     | 0.34 | 0     | 35 | 1      |           |             |      |
| <i>C.n.</i> 1960 - 1979 | 0     | 0.41 | 0     | 35 | 1      |           |             |      |
| <i>H.s.</i> 1960 - 1979 | 0.25  | 0.35 | 0.72  | 35 | 0.48   |           |             |      |
| <i>C.n.</i> 1930 - 1959 | 0.5   | 0.39 | 1.27  | 35 | 0.21   |           |             |      |
| <i>H.s.</i> 1930 - 1959 | 0.5   | 0.38 | 1.31  | 35 | 0.2    |           |             |      |
| <b>Gastropoda</b>       |       |      |       |    |        |           |             |      |
| <i>P.o.</i>             | 0     | 0.23 | 0     | 35 | 1      | CORE:SITE | (Intercept) | 0    |
| <i>C.n.</i>             | 0.33  | 0.29 | 1.14  | 35 | 0.26   | SITE      | (Intercept) | 0    |
| <i>H.s.</i>             | 0.06  | 0.24 | 0.26  | 35 | 0.8    | Residual  |             | 0.32 |
| 1980 - 1997             | 0     | 0.32 | 0     | 35 | 1      |           |             |      |
| 1960 - 1979             | 0.5   | 0.32 | 1.56  | 35 | 0.13   |           |             |      |
| 1930 - 1959             | 0     | 0.32 | 0     | 35 | 1      |           |             |      |
| <i>C.n.</i> 1980 - 1997 | 0     | 0.41 | 0     | 35 | 1      |           |             |      |
| <i>H.s.</i> 1980 - 1997 | 0.1   | 0.36 | 0.29  | 35 | 0.77   |           |             |      |
| <i>C.n.</i> 1960 - 1979 | -0.83 | 0.43 | -1.92 | 35 | 0.06   |           |             |      |
| <i>H.s.</i> 1960 - 1979 | -0.56 | 0.37 | -1.53 | 35 | 0.13   |           |             |      |
| <i>C.n.</i> 1930 - 1959 | -0.33 | 0.41 | -0.8  | 35 | 0.43   |           |             |      |
| <i>H.s.</i> 1930 - 1959 | -0.06 | 0.4  | -0.16 | 35 | 0.88   |           |             |      |
| <b>Echinoidea</b>       |       |      |       |    |        |           |             |      |
| <i>P.o.</i>             | 0.5   | 0.08 | 5.92  | 35 | <0.001 | CORE:SITE | (Intercept) | 0    |
| <i>C.n.</i>             | -0.5  | 0.11 | -4.58 | 35 | <0.001 | SITE      | (Intercept) | 0    |
| <i>H.s.</i>             | -0.5  | 0.09 | -5.58 | 35 | <0.001 | Residual  |             | 0.12 |
| 1980 - 1997             | -0.5  | 0.12 | -4.18 | 35 | <0.001 |           |             |      |
| 1960 - 1979             | -0.5  | 0.12 | -4.18 | 35 | <0.001 |           |             |      |
| 1930 - 1959             | -0.5  | 0.12 | -4.18 | 35 | <0.001 |           |             |      |
| <i>C.n.</i> 1980 - 1997 | 0.5   | 0.15 | 3.24  | 35 | <0.001 |           |             |      |
| <i>H.s.</i> 1980 - 1997 | 0.5   | 0.13 | 3.77  | 35 | <0.001 |           |             |      |

|                         |      |      |       |    |        |                         |
|-------------------------|------|------|-------|----|--------|-------------------------|
| <i>C.n.</i> 1960 - 1979 | 0.5  | 0.16 | 3.09  | 35 | <0.001 |                         |
| <i>H.s.</i> 1960 - 1979 | 0.5  | 0.14 | 3.65  | 35 | <0.001 |                         |
| <i>C.n.</i> 1930 - 1959 | 0.5  | 0.15 | 3.24  | 35 | <0.001 |                         |
| <i>H.s.</i> 1930 - 1959 | 0.5  | 0.15 | 3.35  | 35 | <0.001 |                         |
| <b>Homoscleromorpha</b> |      |      |       |    |        |                         |
| <i>P.o.</i>             | 0.5  | 0.08 | 5.92  | 35 | <0.001 | CORE:SITE (Intercept) 0 |
| <i>C.n.</i>             | -0.5 | 0.11 | -4.58 | 35 | <0.001 | SITE (Intercept) 0      |
| <i>H.s.</i>             | -0.5 | 0.09 | -5.58 | 35 | <0.001 | Residual 0.12           |
| 1980 - 1997             | -0.5 | 0.12 | -4.18 | 35 | <0.001 |                         |
| 1960 - 1979             | -0.5 | 0.12 | -4.18 | 35 | <0.001 |                         |
| 1930 - 1959             | -0.5 | 0.12 | -4.18 | 35 | <0.001 |                         |
| <i>C.n.</i> 1980 - 1997 | 0.5  | 0.15 | 3.24  | 35 | <0.001 |                         |
| <i>H.s.</i> 1980 - 1997 | 0.5  | 0.13 | 3.77  | 35 | <0.001 |                         |
| <i>C.n.</i> 1960 - 1979 | 0.5  | 0.16 | 3.09  | 35 | <0.001 |                         |
| <i>H.s.</i> 1960 - 1979 | 0.5  | 0.14 | 3.65  | 35 | <0.001 |                         |
| <i>C.n.</i> 1930 - 1959 | 0.5  | 0.15 | 3.24  | 35 | <0.001 |                         |
| <i>H.s.</i> 1930 - 1959 | 0.5  | 0.15 | 3.35  | 35 | <0.001 |                         |
